# Supplementary material for: Plant, fungal, bacterial, and nitrogen interactions in the litter layer of a native Patagonian forest
Source: PubMed Central journal article supplement (PMC5951145; doi:10.7717/peerj.4754), 2018-05-11

**S1 Figure. Tree triangle in a native Patagonian forest.** Tree species of the genus *Nothofagus* in a temperate forest in Patagonia, South America. The intersection of the tree canopies (*N. obliqua* on the upper left, *N. nervosa* on the bottom left and *N. dombeyi* on the right) directly control belowground conditions. This "tree triangle" design allows studying plant species effects from the litter layer microbial point of view. Photograph courtesy of Jazmín Vrsalovic.

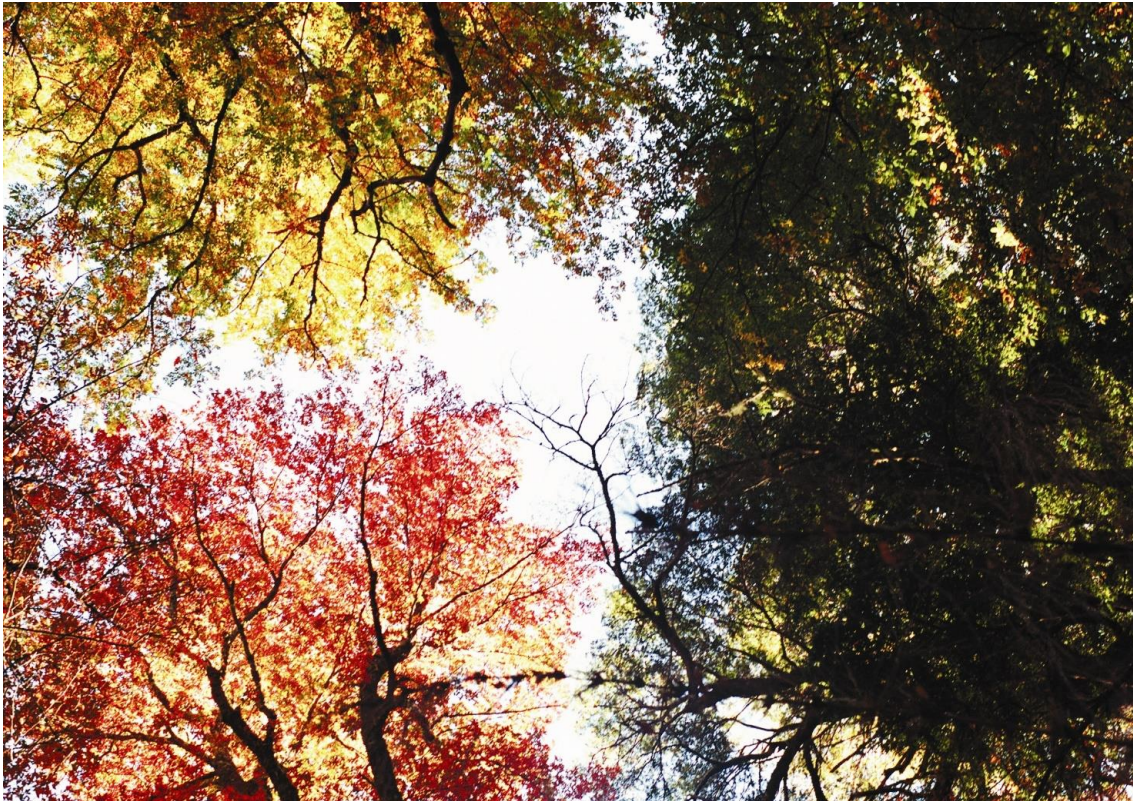

Supplement: peerj-06-4754-s001.pdf [file peerj-06-4754-s001.pdf]
